# Supplementary material for: Mass-producible 2D-MoSe2bulk modified screen-printed electrodes provide significant electrocatalytic performances towards the hydrogen evolution reaction
Source: Royal Society of Chemistry journal article supplement (doi:10.1039/c6se00115g), 2017-01-01
Supplement: c6se00115g1.pdf [file c6se00115g1.pdf]

**Electronic Supporting Information (ESI) for the following publication:**

**Mass-Producible 2D-MoSe<sub>2</sub> Bulk Modified Screen-Printed  
Electrodes Provide Significant Electrocatalytic  
Performances towards the Hydrogen Evolution Reaction**

Samuel J. Rowley-Neale<sup>1</sup>, Christopher W. Foster<sup>1</sup>, Graham C. Smith<sup>2</sup>,  
Dale A. C. Brownson<sup>1</sup> and Craig E. Banks<sup>1\*</sup>

<sup>1</sup>: *Faculty of Science and Engineering, Manchester Metropolitan University, Chester Street,  
Manchester M1 5GD, UK.*

<sup>2</sup>: *Faculty of Science and Engineering, Department of Natural Sciences, University of  
Chester, Thornton Science Park, Pool Lane, Ince, Chester CH2 4NU, UK.*

\*To whom correspondence should be addressed.

Email: [c.banks@mmu.ac.uk](mailto:c.banks@mmu.ac.uk); Tel: ++(0)1612471196; Fax: ++(0)1612476831

Website: [www.craigbanksresearch.com](http://www.craigbanksresearch.com)

## Turn Over Frequency (ToF) Calculation

In order to evaluate how the intrinsic catalytic activity of the 2D-MoSe<sub>2</sub> alters with varying percentage of ink modification on a ‘per active site’ basis, the ToF was deduced using a modified method reported previously.<sup>1,2</sup> In this calculation, it is assumed that the surface of the 2D-MoSe<sub>2</sub> nanosheets are atomically flat (although the true modification will have a finite roughness).<sup>1</sup> Taking the selenium to selenium bond distance to be 2.735 Å, corresponding to an area of 4.12 Å<sup>2</sup>/Se atom, which can be used to calculate the surface area occupied by each MoSe<sub>2</sub>:

$$4.12 \frac{\text{Å}^2}{\text{Se atom}} * \frac{2 \text{ Se atom}}{1 \text{ MoSe}_2} = 8.24 \frac{\text{Å}^2}{\text{MoSe}_2} \quad [1]$$

Using the derived area for a MoSe<sub>2</sub> molecule (corresponding to the number of surface sites for a flat standard) it is possible to determine the number of MoSe<sub>2</sub> molecules per cm<sup>2</sup> geometric area:

$$\frac{1 \text{ MoSe}_2}{8.24 \text{ Å}^2} * \frac{10^{16} \text{ Å}^2}{0.0707 \text{ cm}^2} = 1.717 * 10^{16} \frac{\text{MoSe}_2}{\text{cm}^2} \quad [2]$$

The number of electrochemically accessible surface sites can be determined from the following:

$$\frac{\# \text{ Surface Sites (Catalyst)}}{\text{cm}^2 \text{ geometric area}} = \frac{\# \text{ Surface Sites (Flat Standard)}}{\text{cm}^2 \text{ geometric area}} * R_F \quad [3]$$

It is also essential to accurately determine the roughness factor ( $R_F$ ) for each of the MoSe<sub>2</sub>-SPEs, as is common within the literature (See Roughness Factor Calculation Section). The following allows the ToF on a per-site basis to be determined:

$$\text{TOF per site} = \frac{\# \text{ Total Hydrogen Turn Overs} / \text{cm}^2 \text{ geometric area}}{\# \text{ Surface Sites (Catalyst)} / \text{cm}^2 \text{ geometric area}} \quad [4]$$

Taking the value of current density (mA cm<sup>-2</sup>) at the potential of -0.75 V (at a 25 mVs<sup>-1</sup> scan rate) and using the  $R_F$  calculated, per-site the ToF can be deduced from the following:

$$\left( j \frac{\text{mA}}{\text{cm}^2} \right) \left( \frac{1 \text{ A}}{1000 \text{ mA}} \right) \left( \frac{1 \text{ C/s}}{1 \text{ A}} \right) \left( \frac{1 \text{ mol } e^-}{96,485.3 \text{ C}} \right) \left( \frac{1 \text{ mol } H_2}{2 \text{ mol } e^-} \right) \left( \frac{6.02214 * 10^{23}}{1 \text{ mol } H_2} \right) = 5.358 * 10^{15} \frac{H_2/Se}{\text{cm}^2} \text{ per } \frac{\text{mA}}{\text{cm}^2} \quad [5]$$

Using equation 6 and a value derived from formula 5, it is possible to determine a value for the ToF:

$$\left( 5.358 * 10^{15} \frac{H_2/Se}{\text{cm}^2} \right) \left( \frac{\text{mA}}{\text{cm}^2} \right) \left( \frac{1 \text{ cm}^2}{3.604 * 10^{16} \text{ surface sites}} \right) = 1.48 \frac{H_2/Se}{\text{surface sites}} \quad [6]$$

At the chosen potential ( $-0.75$  V) the current densities were found to correspond to  $-1.52$ ,  $-1.72$ ,  $-1.67$  and  $-1.01$  mA cm $^{-2}$  for the 5, 10, 20 and 40% MoSe $_2$ -SPEs. Using these values the ToF values deduced from the above equations were found to correspond to 2.76, 1.48, 0.92 and 0.36  $\frac{H_2/Se}{Surface\ Site}$ .

### **Roughness Factor Calculation**

Modifying the method of Shin *et al.*<sup>3</sup> and Rowley *et al.*,<sup>2</sup> the double layer capacitance can be used to calculate the active surface area of the MoSe $_2$ -SPEs. Cyclic voltammetry was performed using a potential range of 0.01 to 0.11 V, which is in the non-Faradaic window, at each of the following scan rates (20, 40, 60, 80, 100 mVs $^{-1}$ ). The potential range used is presumed to have no Faradaic processes occurring, therefore cathodic and anodic current densities are associated with charging of the electrical double layer (see ESI Figure 3). ESI Figure 4 shows the difference between the anodic and cathodic current at 0.06 V *versus* the corresponding scan rate. The slope of each set of points in ESI Figure 4 being proportional to a doubling of the double layer capacitance. The double layer capacitance values determined are 35.5, 75.8, 117.7, 191.6  $\mu$ F cm $^{-2}$  for SPEs modified with the 5%, 10%, 20% and 40% MoSe $_2$ -SPEs respectively.

**ESI Table 1.** Compositional analysis of XPS spectra for a 10% MoSe<sub>2</sub>-SPE pre and post 1000 repeat scan in 0.5 M H<sub>2</sub>SO<sub>4</sub>. Scan rate utilised 100 mVs<sup>-1</sup> (vs. SCE). Results shown in atom percentage concentration, excluding H which is not detected by this technique.

| Electrode                                                                                     | Element | Atom % Composition |
|-----------------------------------------------------------------------------------------------|---------|--------------------|
| 10% MoSe <sub>2</sub> -SPE <i>pre</i> -1000 repeat scans                                      | C       | 84.51              |
|                                                                                               | Cl      | 10.45              |
|                                                                                               | O       | 4.35               |
|                                                                                               | Se      | 0.43               |
|                                                                                               | Mo      | 0.25               |
| 10% MoSe <sub>2</sub> -SPE <i>post</i> -1000 repeat scans whilst utilising a platinum counter | Na      | 1.75               |
|                                                                                               | O       | 16.65              |
|                                                                                               | N       | 0.89               |
|                                                                                               | C       | 72.48              |
|                                                                                               | Cl      | 5.76               |
|                                                                                               | Se      | 0.19               |
|                                                                                               | Si      | 1.03               |
|                                                                                               | P       | 0.51               |
|                                                                                               | Al      | 0.64               |
| Mo                                                                                            | 0.06    |                    |
| 10% MoSe <sub>2</sub> -SPE <i>post</i> -1000 repeat scans whilst utilising a carbon counter   | Pt      | 0.04               |
|                                                                                               | Na      | 0.09               |
|                                                                                               | O       | 24.9               |
|                                                                                               | N       | 1.45               |
|                                                                                               | C       | 66.59              |
|                                                                                               | Cl      | 4.51               |
|                                                                                               | Se      | 1.01               |
|                                                                                               | Si      | 0.55               |
| Mo                                                                                            | 0.23    |                    |
| Al                                                                                            | 0.67    |                    |

**ESI Figure 1.** Photographs of SPEs: (A) the SPE design utilised herein, with a working electrode surface area of  $0.0707\text{ cm}^2$ ; (B) a possible variant upon the subsequent design, with a working electrode surface that has an area of  $4.5\text{ cm}^2$ .

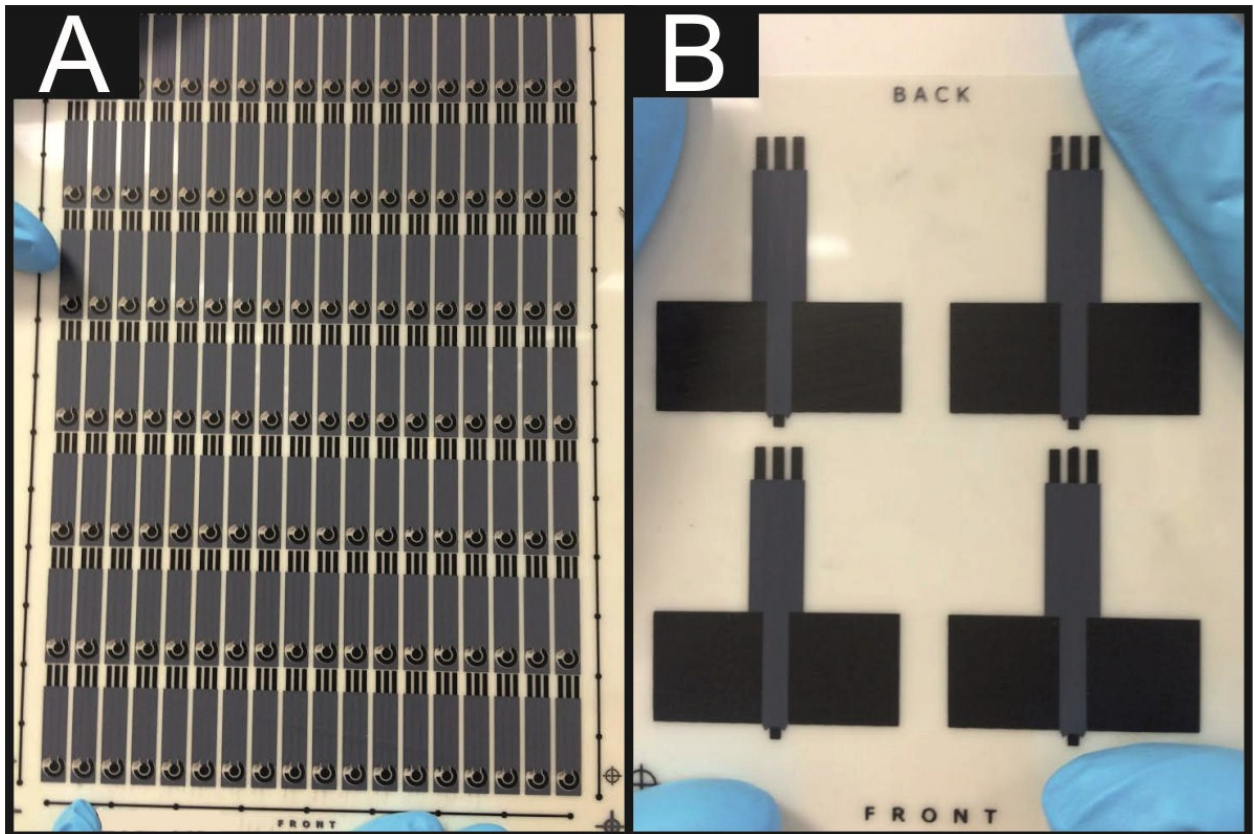

**ESI Figure 2.** High-resolution XPS spectra of Mo 3d and Se 3d regions of a 10% MoSe<sub>2</sub>-SPE (A and B respectively).

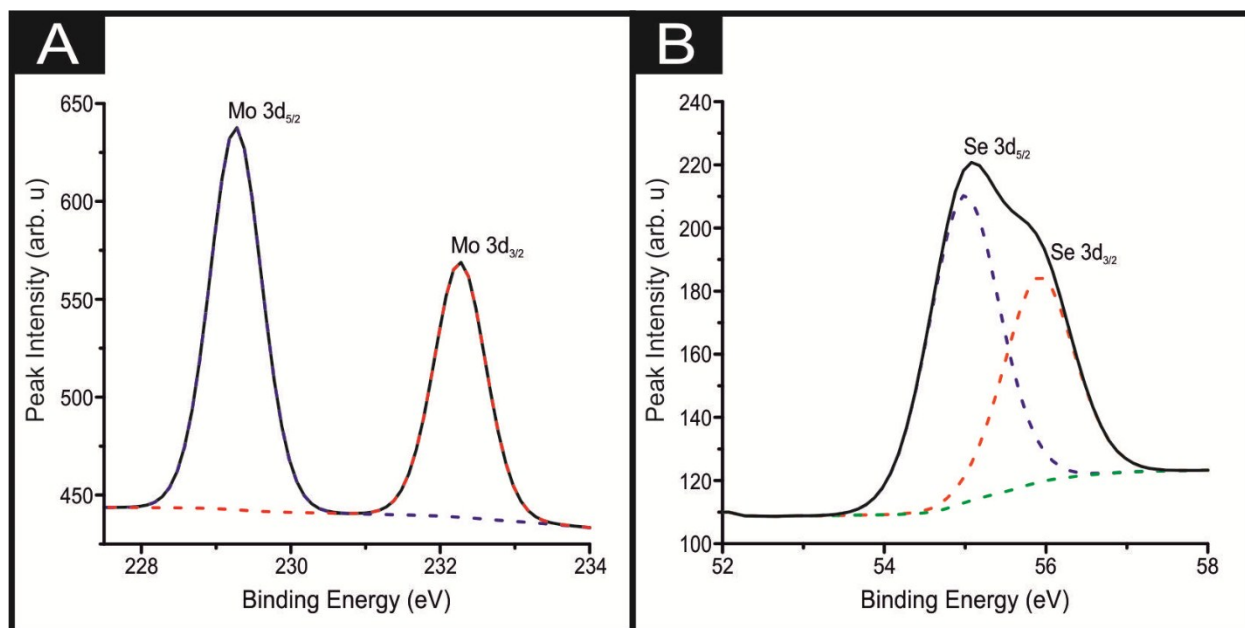

**ESI Figure 3.** Typical cyclic voltammograms recorded in a solution of 0.5 M H<sub>2</sub>SO<sub>4</sub> using 5, 10, 20 and 40% MoSe<sub>2</sub>-SPEs. Scan rate: 100 mVs<sup>-1</sup> (vs. SCE).

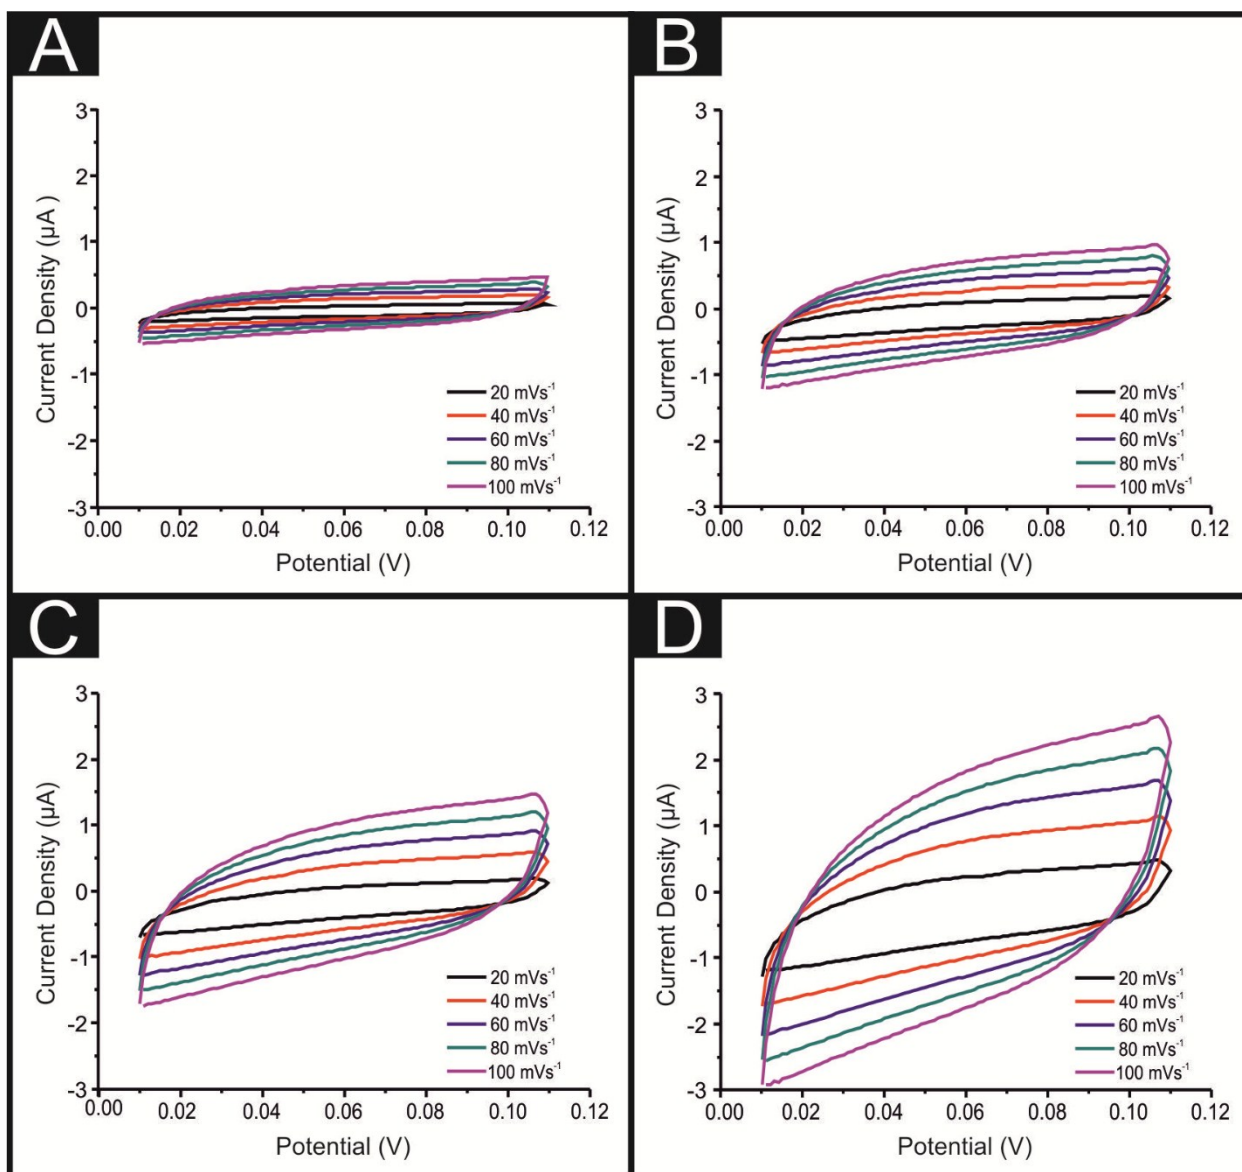

**ESI Figure 4.** The difference in anodic and cathodic current density taken at +0.06 V *versus* scan rate ( $\text{mVs}^{-1}$  vs. SCE). The slope of the linear regression indicates the value of double layer capacitance ( $C_{dl}$ :  $\mu\text{F cm}^{-2}$ ).

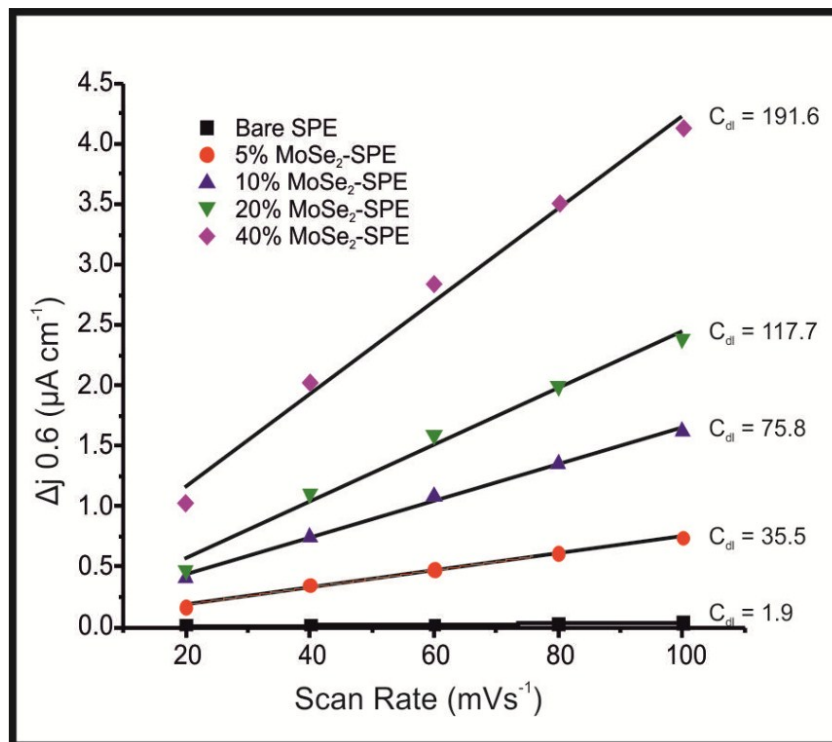



**ESI Figure 5.** SEM images of a bare/unmodified SPE surface (A and B) and a 10% MoSe<sub>2</sub>-SPE (C and D). SEM magnifications were ×1k (scale bare, 10 μm) and ×10k (scale bare, 1 μm) respectively for the progressive images (A to B and C to D).

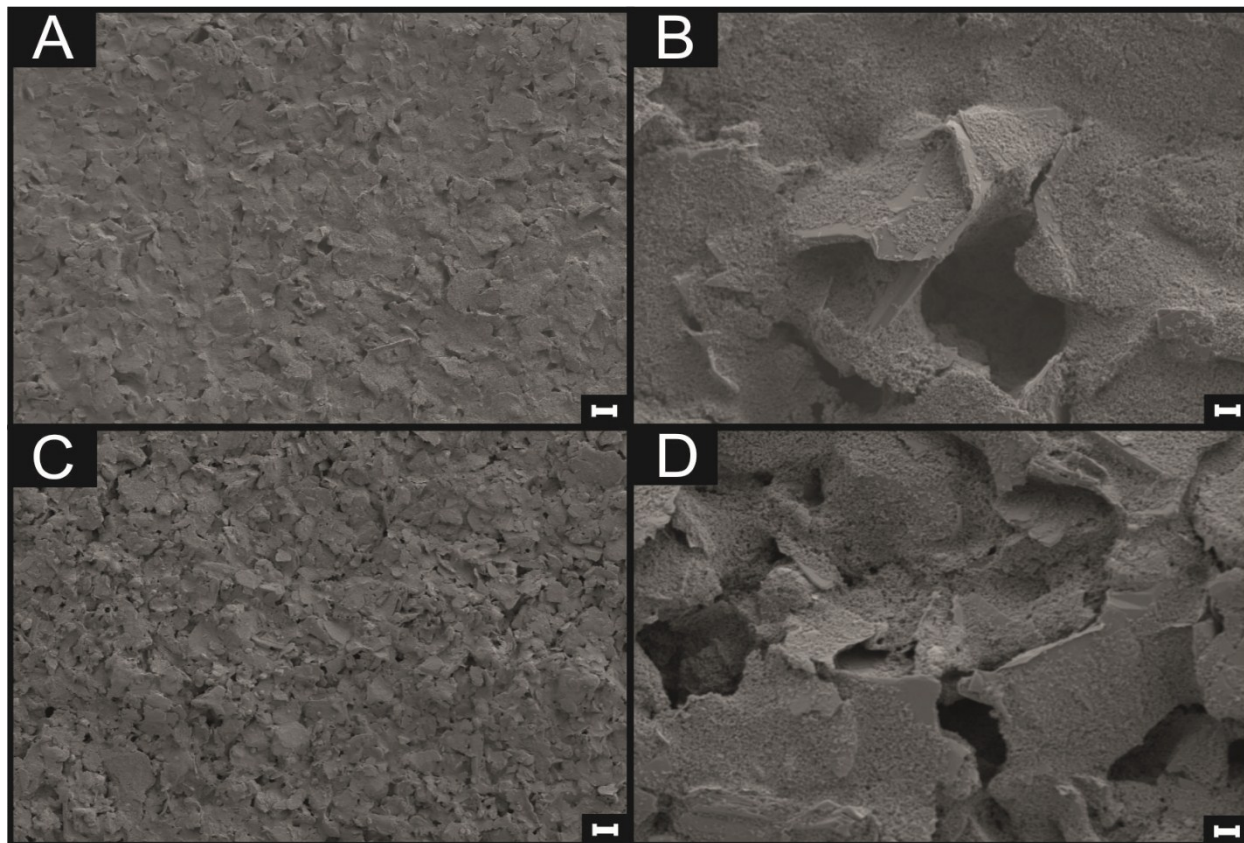

**ESI Figure 6.** An electrochemical impedance spectroscopy (EIS) study showing charge transfer resistance (ohm) values for the bare/unmodified, 5, 10, 20 and 40% MoSe<sub>2</sub>-SPE's. The EIS study was carried out in 1 mM potassium ferrocyanide (II) in 1 M KCl, the frequency was from 0.1–100,000 Hz using an amplitude of 10 mV (*vs.* SCE). Inset: circuit utilised within experiments.

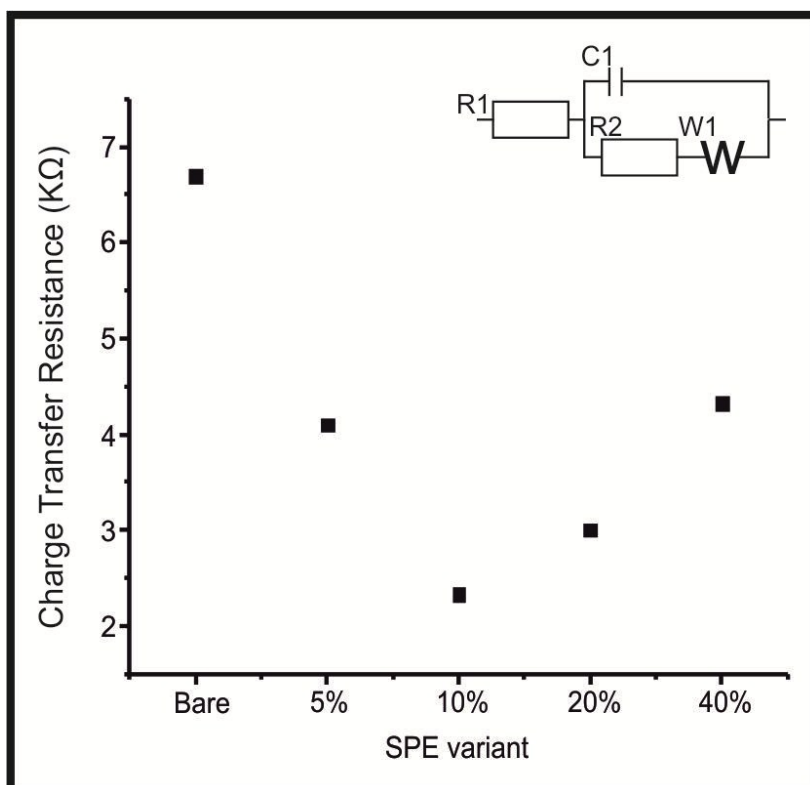

**ESI Figure 7.** Cyclic stability examination of a 10% MoSe<sub>2</sub>-SPE linear sweep voltammetry performed between the potential range of 0 and -1.4 V using a carbon counter electrode, repeated for 1000 cycles. The figure shows the initial (yellow line), 10<sup>th</sup> (green line), 100<sup>th</sup> (dark green) and 1000<sup>th</sup> scan (black line). Scan rate: 100 mVs<sup>-1</sup> (vs. SCE).

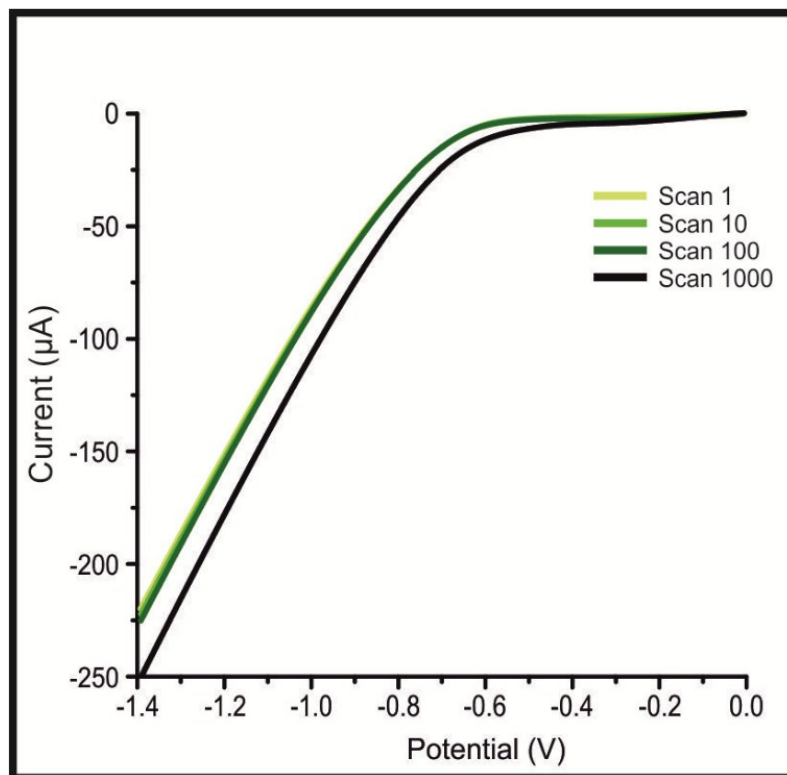

**ESI Figure 8.** The current observed using chronoamperometry with the potential held at  $-0.75$  V (vs. SCE) for 36,000 seconds using a 10% MoSe<sub>2</sub>-SPE recorded in 0.5 M H<sub>2</sub>SO<sub>4</sub>.

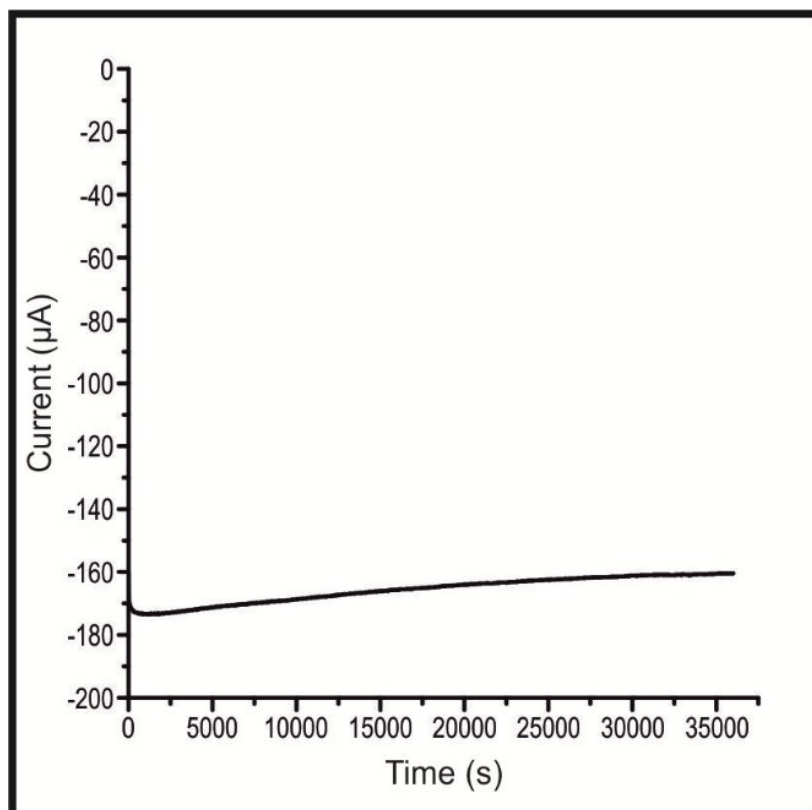

**ESI Figure 9.** Cyclic stability examination of a  $400 \text{ mg cm}^{-2}$   $\text{MoSe}_2$  SPE, modified *via* the drop-casting technique, using linear sweep voltammetry. The potential range of 0 to  $-1.4 \text{ V}$  was utilised and repeated for 1000 cycles. The figures show the initial (yellow line), 10<sup>th</sup> (green line) scans, 100<sup>th</sup> (dark green) and 1000<sup>th</sup> scan (black line). Scan rate:  $100 \text{ mVs}^{-1}$  (vs. SCE).

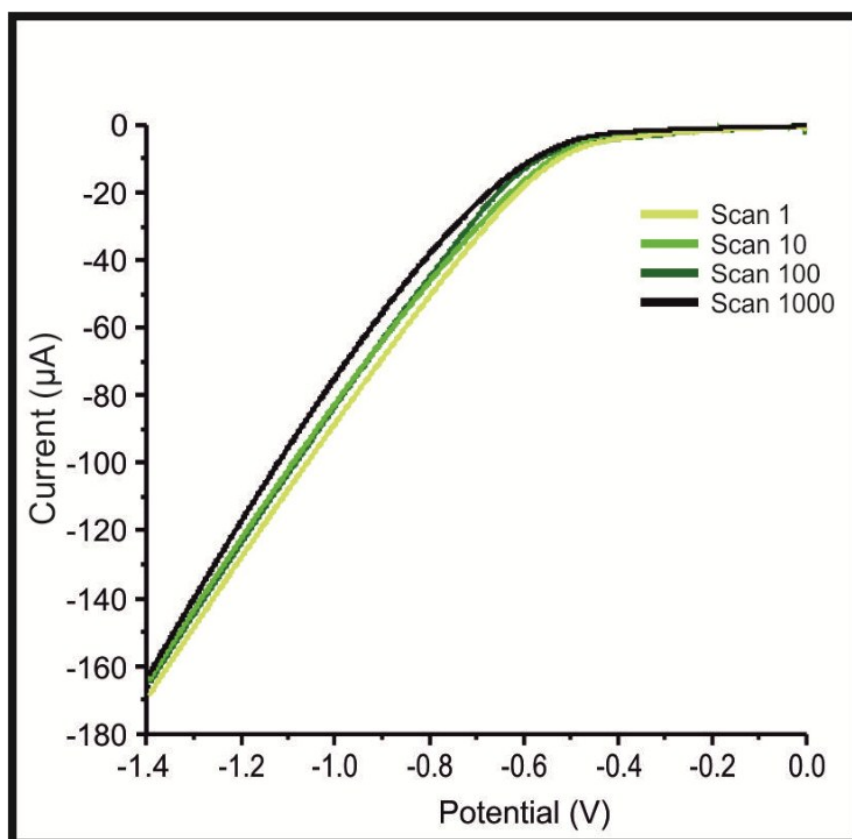

## References

1. J. D. Benck, Z. Chen, L. Y. Kuritzky, A. J. Forman and T. F. Jaramillo, *ACS Catal.*, 2012, **2**, 1916-1923.
2. S. J. Rowley-Neale, D. A. C. Brownson, G. C. Smith, D. A. G. Sawtell, P. J. Kelly and C. E. Banks, *Nanoscale*, 2015, **7**, 18152-18168.
3. S. Shin, Z. Jin, D. H. Kwon, R. Bose and Y.-S. Min, *Langmuir*, 2015, **31**, 1196-1202.
